# Supplementary material for: Influence of Overweight and Obesity on Morbidity and Mortality among Hospitalized Patients in Sri Lanka: A Single-Center Analysis
Source: J Obes. 2022 Aug 18;2022:9172365. doi: 10.1155/2022/9172365 (PMC9411002; doi:10.1155/2022/9172365)
Supplement: Supplementary Materials — Supplementary File 1: tables. Supplementary File 2: questionnaire. Supplementary File 3: STROBE statement—checklist of items that should be included in reports of cohort studies. [file 9172365.f1.zip]

Archive with 3 entries (3 files):
- 9172365.f1/Supplementary file 1 (2).docx
- 9172365.f1/Supplementary file 2 (2).docx
- 9172365.f1/Supplementary file 3 (2).docx
